## CORRECTION

# Correction: Presentations of children to emergency departments across Europe and the COVID-19 pandemic: A multinational observational study

The PLOS *Medicine* Staff

[Fig 3](#) is incorrect. The authors have provided a corrected version here. The publisher apologises for the error.

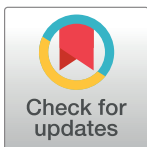

---

## OPEN ACCESS

**Citation:** The PLOS *Medicine* Staff (2022) Correction: Presentations of children to emergency departments across Europe and the COVID-19 pandemic: A multinational observational study. PLoS Med 19(11): e1004126. <https://doi.org/10.1371/journal.pmed.1004126>

**Published:** November 9, 2022

**Copyright:** © 2022 The PLOS Medicine Staff. This is an open access article distributed under the terms of the [Creative Commons Attribution License](#), which permits unrestricted use, distribution, and reproduction in any medium, provided the original author and source are credited.

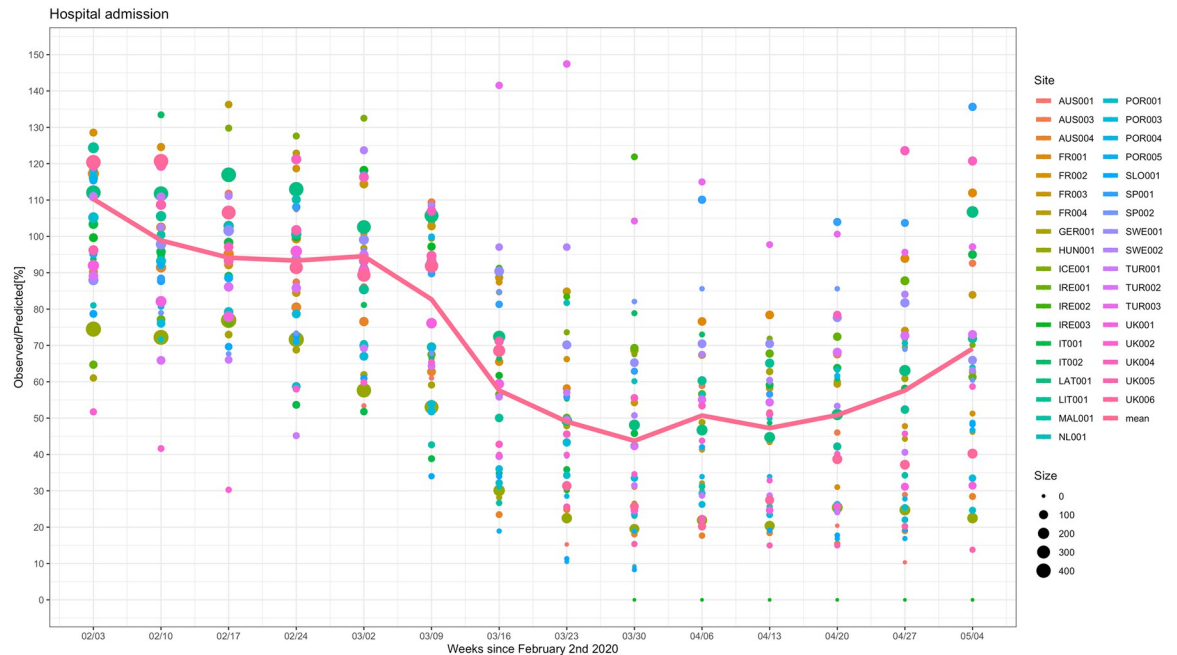

**Fig 3. Observed versus predicted hospital admissions for patients attending the ED (%).** The observed versus predicted number of children admitted to hospital from the ED in countries across Europe in the weeks following February 2, 2020 until May 11, 2020, for all sites combined. The color and the size of the dots reflect the actual number of ED attendances for each site and for each time window. The line connects the mean of the observed vs. predicted point estimates for each of the individual sites for each time window.

<https://doi.org/10.1371/journal.pmed.1004126.g001>

### Reference

1. Nijman RG, Honeyford K, Farrugia R, Rose K, Bogнар Z, Buonsenso D, et al. (2022) Presentations of children to emergency departments across Europe and the COVID-19 pandemic: A multinational observational study. *PLoS Med* 19(8): e1003974. <https://doi.org/10.1371/journal.pmed.1003974> PMID: 36026507
